# Supplementary material
Source: publisher figshare collection journal article supplement (https://acs.figshare.com/ndownloader/files/4543612)
Supplement: Supplementary file 1 [file 4543612]

 
data_bax1652
 
_audit_creation_method            SHELXL-97
_chemical_name_systematic
;
 ?
;
_chemical_name_common             ?
_chemical_melting_point           ?
_chemical_formula_moiety          'C98 H150 Si8'
_chemical_formula_sum
 'C98 H150 Si8'
_chemical_formula_weight          1552.90
 
loop_
 _atom_type_symbol
 _atom_type_description
 _atom_type_scat_dispersion_real
 _atom_type_scat_dispersion_imag
 _atom_type_scat_source
 'C'  'C'   0.0033   0.0016
 'International Tables Vol C Tables 4.2.6.8 and 6.1.1.4'
 'H'  'H'   0.0000   0.0000
 'International Tables Vol C Tables 4.2.6.8 and 6.1.1.4'
 'Si'  'Si'   0.0817   0.0704
 'International Tables Vol C Tables 4.2.6.8 and 6.1.1.4'
 
_symmetry_cell_setting            'Monoclinic'
_symmetry_space_group_name_H-M    'C 2/c'
_symmetry_space_group_name_Hall   '-C 2yc'
 
loop_
 _symmetry_equiv_pos_as_xyz
 'x, y, z'
 '-x, y, -z+1/2'
 'x+1/2, y+1/2, z'
 '-x+1/2, y+1/2, -z+1/2'
 '-x, -y, -z'
 'x, -y, z-1/2'
 '-x+1/2, -y+1/2, -z'
 'x+1/2, -y+1/2, z-1/2'
 
_cell_length_a                    47.6120(15)
_cell_length_b                    14.9290(5)
_cell_length_c                    14.7370(5)
_cell_angle_alpha                 90.00
_cell_angle_beta                  97.930(2)
_cell_angle_gamma                 90.00
_cell_volume                      10374.9(6)
_cell_formula_units_Z             4
_cell_measurement_temperature     173(2)
_cell_measurement_reflns_used     9501
_cell_measurement_theta_min       0.998
_cell_measurement_theta_max       28.700
 
_exptl_crystal_description        prism
_exptl_crystal_colour             colorless
_exptl_crystal_size_max           0.16
_exptl_crystal_size_mid           0.14
_exptl_crystal_size_min           0.14
_exptl_crystal_density_meas       ?
_exptl_crystal_density_diffrn     0.994
_exptl_crystal_density_method     'not measured'
_exptl_crystal_F_000              3400
_exptl_absorpt_coefficient_mu     0.143
_exptl_absorpt_correction_type    'none'
_exptl_absorpt_correction_T_min   ?
_exptl_absorpt_correction_T_max   ?
_exptl_absorpt_process_details    ?
 
_exptl_special_details
;
 ?
;
 
_diffrn_ambient_temperature       173(2)
_diffrn_radiation_wavelength      0.71073
_diffrn_radiation_type            MoK\a
_diffrn_radiation_source          'fine-focus sealed tube'
_diffrn_radiation_monochromator   graphite
_diffrn_measurement_device_type   'KappaCCD'
_diffrn_measurement_method        'phi and omega scans'
_diffrn_detector_area_resol_mean  ?
_diffrn_standards_number          ?
_diffrn_standards_interval_count  ?
_diffrn_standards_interval_time   ?
_diffrn_standards_decay_%         ?
_diffrn_reflns_number             21458
_diffrn_reflns_av_R_equivalents   0.0368
_diffrn_reflns_av_sigmaI/netI     0.0824
_diffrn_reflns_limit_h_min        -63
_diffrn_reflns_limit_h_max        64
_diffrn_reflns_limit_k_min        -18
_diffrn_reflns_limit_k_max        19
_diffrn_reflns_limit_l_min        -19
_diffrn_reflns_limit_l_max        19
_diffrn_reflns_theta_min          1.43
_diffrn_reflns_theta_max          28.69
_reflns_number_total              13327
_reflns_number_gt                 8169
_reflns_threshold_expression      I>2sigma(I)
 
_computing_data_collection        'Collect (Nonius B.V., 1998)'
_computing_cell_refinement        'Denzo (Nonius B.V., 1998)'
_computing_data_reduction         'Denzo (Nonius B.V., 1998)'
_computing_structure_solution     'SHELXS-97 (Sheldrick, 1997)'
_computing_structure_refinement   'SHELXL-97 (Sheldrick, 1997)'
_computing_molecular_graphics     'PLATON 98 (Spek, 1998)'
_computing_publication_material   'SHELXL-97 (Sheldrick, 1997)'
 
_refine_special_details
;
 Refinement of F^2^ against ALL reflections.  The weighted R-factor wR and
 goodness of fit S are based on F^2^, conventional R-factors R are based
 on F, with F set to zero for negative F^2^. The threshold expression of
 F^2^ > 2sigma(F^2^) is used only for calculating R-factors(gt) etc. and is
 not relevant to the choice of reflections for refinement.  R-factors based
 on F^2^ are statistically about twice as large as those based on F, and R-
 factors based on ALL data will be even larger.
;
 
_refine_ls_structure_factor_coef  Fsqd
_refine_ls_matrix_type            full
_refine_ls_weighting_scheme       calc
_refine_ls_weighting_details
 'calc w=1/[\s^2^(Fo^2^)+(0.0747P)^2^+13.2050P] where P=(Fo^2^+2Fc^2^)/3'
_atom_sites_solution_primary      direct
_atom_sites_solution_secondary    difmap
_atom_sites_solution_hydrogens    geom
_refine_ls_hydrogen_treatment     constr
_refine_ls_extinction_method      none
_refine_ls_extinction_coef        ?
_refine_ls_number_reflns          13327
_refine_ls_number_parameters      503
_refine_ls_number_restraints      0
_refine_ls_R_factor_all           0.1281
_refine_ls_R_factor_gt            0.0724
_refine_ls_wR_factor_ref          0.1923
_refine_ls_wR_factor_gt           0.1669
_refine_ls_goodness_of_fit_ref    1.027
_refine_ls_restrained_S_all       1.027
_refine_ls_shift/su_max           0.001
_refine_ls_shift/su_mean          0.000
 
loop_
 _atom_site_label
 _atom_site_type_symbol
 _atom_site_fract_x
 _atom_site_fract_y
 _atom_site_fract_z
 _atom_site_U_iso_or_equiv
 _atom_site_adp_type
 _atom_site_occupancy
 _atom_site_symmetry_multiplicity
 _atom_site_calc_flag
 _atom_site_refinement_flags
 _atom_site_disorder_assembly
 _atom_site_disorder_group
C1 C 0.24468(4) 0.20025(13) 0.91808(13) 0.0213(4) Uani 1 1 d . . .
C2 C 0.22228(4) 0.24725(14) 0.95146(14) 0.0216(4) Uani 1 1 d . . .
C3 C 0.27188(4) 0.20448(14) 0.96757(13) 0.0222(4) Uani 1 1 d . . .
H3 H 0.2869 0.1733 0.9451 0.027 Uiso 1 1 calc R . .
C4 C 0.24035(4) 0.14820(14) 0.83588(14) 0.0251(5) Uani 1 1 d . . .
C5 C 0.23833(5) 0.10277(15) 0.76763(15) 0.0305(5) Uani 1 1 d . . .
C6 C 0.20725(6) 0.0685(2) 0.57867(18) 0.0471(7) Uani 1 1 d . . .
H6 H 0.1911 0.0368 0.6014 0.056 Uiso 1 1 calc R . .
C7 C 0.19962(7) 0.1662(2) 0.5755(2) 0.0688(10) Uani 1 1 d . . .
H7A H 0.2132 0.1994 0.5442 0.103 Uiso 1 1 calc R . .
H7B H 0.2001 0.1890 0.6380 0.103 Uiso 1 1 calc R . .
H7C H 0.1805 0.1739 0.5420 0.103 Uiso 1 1 calc R . .
C8 C 0.20930(8) 0.0293(3) 0.4826(2) 0.0817(13) Uani 1 1 d . . .
H8A H 0.1915 0.0406 0.4422 0.123 Uiso 1 1 calc R . .
H8B H 0.2126 -0.0354 0.4877 0.123 Uiso 1 1 calc R . .
H8C H 0.2250 0.0579 0.4572 0.123 Uiso 1 1 calc R . .
C9 C 0.23995(6) -0.08410(16) 0.68774(18) 0.0400(6) Uani 1 1 d . . .
H9 H 0.2432 -0.1163 0.6307 0.048 Uiso 1 1 calc R . .
C10 C 0.21181(7) -0.1183(2) 0.7131(2) 0.0662(9) Uani 1 1 d . . .
H10A H 0.2132 -0.1827 0.7255 0.099 Uiso 1 1 calc R . .
H10B H 0.1967 -0.1071 0.6623 0.099 Uiso 1 1 calc R . .
H10C H 0.2075 -0.0869 0.7679 0.099 Uiso 1 1 calc R . .
C11 C 0.26449(7) -0.1088(2) 0.7616(2) 0.0586(8) Uani 1 1 d . . .
H11A H 0.2621 -0.0785 0.8190 0.088 Uiso 1 1 calc R . .
H11B H 0.2824 -0.0901 0.7420 0.088 Uiso 1 1 calc R . .
H11C H 0.2647 -0.1738 0.7711 0.088 Uiso 1 1 calc R . .
C12 C 0.27470(6) 0.07053(17) 0.62410(17) 0.0379(6) Uani 1 1 d . . .
H12 H 0.2889 0.0639 0.6805 0.045 Uiso 1 1 calc R . .
C13 C 0.28500(7) 0.0072(2) 0.5540(2) 0.0569(8) Uani 1 1 d . . .
H13A H 0.2714 0.0074 0.4977 0.085 Uiso 1 1 calc R . .
H13B H 0.2866 -0.0537 0.5792 0.085 Uiso 1 1 calc R . .
H13C H 0.3036 0.0271 0.5402 0.085 Uiso 1 1 calc R . .
C14 C 0.27691(8) 0.1680(2) 0.5959(2) 0.0667(9) Uani 1 1 d . . .
H14A H 0.2968 0.1825 0.5915 0.100 Uiso 1 1 calc R . .
H14B H 0.2700 0.2067 0.6417 0.100 Uiso 1 1 calc R . .
H14C H 0.2654 0.1775 0.5362 0.100 Uiso 1 1 calc R . .
C15 C 0.19423(5) 0.24807(14) 0.90163(14) 0.0241(4) Uani 1 1 d . . .
C16 C 0.17067(5) 0.25190(14) 0.86039(14) 0.0255(5) Uani 1 1 d . . .
C17 C 0.14303(4) 0.25092(14) 0.80798(14) 0.0230(4) Uani 1 1 d . . .
C18 C 0.13882(5) 0.20301(15) 0.72588(14) 0.0256(5) Uani 1 1 d . . .
H18 H 0.1545 0.1731 0.7058 0.031 Uiso 1 1 calc R . .
C19 C 0.11228(5) 0.19774(14) 0.67251(14) 0.0247(4) Uani 1 1 d . . .
C20 C 0.08898(4) 0.24163(14) 0.70266(14) 0.0253(5) Uani 1 1 d . . .
C21 C 0.09311(4) 0.28896(15) 0.78458(14) 0.0254(5) Uani 1 1 d . . .
H21 H 0.0774 0.3182 0.8049 0.030 Uiso 1 1 calc R . .
C22 C 0.11962(4) 0.29483(14) 0.83790(13) 0.0230(4) Uani 1 1 d . . .
C23 C 0.06136(5) 0.24083(17) 0.64945(16) 0.0337(5) Uani 1 1 d . . .
C24 C 0.03821(6) 0.2458(2) 0.60582(19) 0.0502(7) Uani 1 1 d . A .
C25 C -0.0087(2) 0.1715(9) 0.4683(10) 0.0739(15) Uani 0.50 1 d P A 1
H25A H 0.0022 0.1662 0.4167 0.111 Uiso 0.50 1 calc PR A 1
H25B H -0.0288 0.1795 0.4449 0.111 Uiso 0.50 1 calc PR A 1
H25C H -0.0062 0.1169 0.5056 0.111 Uiso 0.50 1 calc PR A 1
C26 C -0.0230(2) 0.2775(7) 0.6149(8) 0.0739(15) Uani 0.50 1 d P A 1
H26A H -0.0419 0.2849 0.5797 0.111 Uiso 0.50 1 calc PR A 1
H26B H -0.0183 0.3305 0.6532 0.111 Uiso 0.50 1 calc PR A 1
H26C H -0.0229 0.2243 0.6539 0.111 Uiso 0.50 1 calc PR A 1
C27 C 0.0075(2) 0.3707(8) 0.4647(7) 0.0739(15) Uani 0.50 1 d P A 1
H27A H 0.0207 0.3593 0.4208 0.111 Uiso 0.50 1 calc PR A 1
H27B H 0.0147 0.4196 0.5058 0.111 Uiso 0.50 1 calc PR A 1
H27C H -0.0111 0.3876 0.4316 0.111 Uiso 0.50 1 calc PR A 1
C25B C -0.0056(3) 0.1462(9) 0.4787(10) 0.0739(15) Uani 0.50 1 d P A 2
H25D H -0.0248 0.1475 0.4448 0.111 Uiso 0.50 1 calc PR A 2
H25E H -0.0045 0.1002 0.5265 0.111 Uiso 0.50 1 calc PR A 2
H25F H 0.0080 0.1322 0.4365 0.111 Uiso 0.50 1 calc PR A 2
C26B C -0.0217(2) 0.3145(7) 0.6084(8) 0.0739(15) Uani 0.50 1 d P A 2
H26D H -0.0405 0.3207 0.5721 0.111 Uiso 0.50 1 calc PR A 2
H26E H -0.0147 0.3736 0.6299 0.111 Uiso 0.50 1 calc PR A 2
H26F H -0.0231 0.2756 0.6611 0.111 Uiso 0.50 1 calc PR A 2
C27B C 0.0084(2) 0.3423(8) 0.4408(6) 0.0739(15) Uani 0.50 1 d P A 2
H27D H 0.0228 0.3182 0.4059 0.111 Uiso 0.50 1 calc PR A 2
H27E H 0.0146 0.4007 0.4665 0.111 Uiso 0.50 1 calc PR A 2
H27F H -0.0096 0.3492 0.4003 0.111 Uiso 0.50 1 calc PR A 2
C28 C 0.12150(5) 0.34588(15) 0.92141(15) 0.0281(5) Uani 1 1 d . . .
C29 C 0.11987(5) 0.38998(16) 0.98873(16) 0.0343(5) Uani 1 1 d . . .
C30 C 0.14241(6) 0.4120(2) 1.18785(18) 0.0536(8) Uani 1 1 d . . .
H30 H 0.1336 0.3570 1.2104 0.064 Uiso 1 1 calc R . .
C31 C 0.16922(7) 0.3794(3) 1.1591(2) 0.0816(13) Uani 1 1 d . . .
H31A H 0.1797 0.4301 1.1380 0.122 Uiso 1 1 calc R . .
H31B H 0.1649 0.3361 1.1092 0.122 Uiso 1 1 calc R . .
H31C H 0.1808 0.3506 1.2111 0.122 Uiso 1 1 calc R . .
C32 C 0.14662(7) 0.4735(3) 1.27040(19) 0.0719(11) Uani 1 1 d . . .
H32A H 0.1584 0.4434 1.3212 0.108 Uiso 1 1 calc R . .
H32B H 0.1281 0.4883 1.2887 0.108 Uiso 1 1 calc R . .
H32C H 0.1560 0.5286 1.2547 0.108 Uiso 1 1 calc R . .
C33 C 0.11808(6) 0.57672(17) 1.06707(19) 0.0431(6) Uani 1 1 d . . .
H33 H 0.1143 0.6100 1.1230 0.052 Uiso 1 1 calc R . .
C34 C 0.09558(7) 0.6058(2) 0.9893(2) 0.0630(9) Uani 1 1 d . . .
H34A H 0.0968 0.6707 0.9807 0.095 Uiso 1 1 calc R . .
H34B H 0.0768 0.5903 1.0043 0.095 Uiso 1 1 calc R . .
H34C H 0.0987 0.5751 0.9328 0.095 Uiso 1 1 calc R . .
C35 C 0.14752(7) 0.6052(2) 1.0474(3) 0.0698(10) Uani 1 1 d . . .
H35A H 0.1521 0.5735 0.9931 0.105 Uiso 1 1 calc R . .
H35B H 0.1616 0.5904 1.1001 0.105 Uiso 1 1 calc R . .
H35C H 0.1477 0.6699 1.0364 0.105 Uiso 1 1 calc R . .
C36 C 0.07796(6) 0.42841(18) 1.11717(18) 0.0424(6) Uani 1 1 d . . .
H36 H 0.0651 0.4360 1.0580 0.051 Uiso 1 1 calc R . .
C37 C 0.07489(8) 0.3319(2) 1.1469(3) 0.0729(10) Uani 1 1 d . . .
H37A H 0.0859 0.3228 1.2074 0.109 Uiso 1 1 calc R . .
H37B H 0.0819 0.2917 1.1025 0.109 Uiso 1 1 calc R . .
H37C H 0.0549 0.3190 1.1500 0.109 Uiso 1 1 calc R . .
C38 C 0.06724(7) 0.4922(2) 1.1860(2) 0.0641(9) Uani 1 1 d . . .
H38A H 0.0475 0.4776 1.1919 0.096 Uiso 1 1 calc R . .
H38B H 0.0684 0.5540 1.1644 0.096 Uiso 1 1 calc R . .
H38C H 0.0790 0.4857 1.2457 0.096 Uiso 1 1 calc R . .
C39 C 0.10878(5) 0.14924(15) 0.58729(15) 0.0293(5) Uani 1 1 d . . .
C40 C 0.10554(5) 0.10972(16) 0.51579(16) 0.0340(5) Uani 1 1 d . . .
C41 C 0.06397(7) 0.0687(2) 0.3485(2) 0.0566(8) Uani 1 1 d . . .
H41 H 0.0521 0.0560 0.3979 0.068 Uiso 1 1 calc R B 1
C42 C 0.0546(2) -0.0047(7) 0.2736(10) 0.0742(12) Uani 0.50 1 d P C 1
H42A H 0.0346 0.0042 0.2489 0.111 Uiso 0.50 1 calc PR C 1
H42B H 0.0570 -0.0644 0.3013 0.111 Uiso 0.50 1 calc PR C 1
H42C H 0.0662 0.0003 0.2240 0.111 Uiso 0.50 1 calc PR C 1
C43 C 0.0556(3) 0.1597(14) 0.3176(10) 0.0742(12) Uani 0.50 1 d P C 1
H43A H 0.0654 0.1760 0.2657 0.111 Uiso 0.50 1 calc PR C 1
H43B H 0.0608 0.2020 0.3679 0.111 Uiso 0.50 1 calc PR C 1
H43C H 0.0351 0.1616 0.2986 0.111 Uiso 0.50 1 calc PR C 1
C42B C 0.0564(2) 0.0265(7) 0.2531(10) 0.0742(12) Uani 0.50 1 d P C 2
H42D H 0.0361 0.0339 0.2326 0.111 Uiso 0.50 1 calc PR C 2
H42E H 0.0611 -0.0374 0.2561 0.111 Uiso 0.50 1 calc PR C 2
H42F H 0.0672 0.0563 0.2097 0.111 Uiso 0.50 1 calc PR C 2
C43B C 0.0579(3) 0.1726(15) 0.3429(10) 0.0742(12) Uani 0.50 1 d P C 2
H43D H 0.0712 0.2015 0.3069 0.111 Uiso 0.50 1 calc PR C 2
H43E H 0.0603 0.1979 0.4048 0.111 Uiso 0.50 1 calc PR C 2
H43F H 0.0384 0.1829 0.3134 0.111 Uiso 0.50 1 calc PR C 2
C44 C 0.10694(6) -0.07263(18) 0.43217(19) 0.0449(7) Uani 1 1 d . . .
H44 H 0.1062 -0.1051 0.3726 0.054 Uiso 1 1 calc R C .
C45 C 0.08353(8) -0.1113(2) 0.4817(3) 0.0749(11) Uani 1 1 d . C .
H45A H 0.0874 -0.1747 0.4952 0.112 Uiso 1 1 calc R . .
H45B H 0.0652 -0.1054 0.4427 0.112 Uiso 1 1 calc R . .
H45C H 0.0830 -0.0786 0.5391 0.112 Uiso 1 1 calc R . .
C46 C 0.13587(7) -0.0914(2) 0.4875(2) 0.0591(8) Uani 1 1 d . C .
H46A H 0.1378 -0.0571 0.5447 0.089 Uiso 1 1 calc R . .
H46B H 0.1509 -0.0736 0.4518 0.089 Uiso 1 1 calc R . .
H46C H 0.1376 -0.1555 0.5015 0.089 Uiso 1 1 calc R . .
C47 C 0.13062(7) 0.09106(19) 0.34249(19) 0.0497(7) Uani 1 1 d . . .
H47 H 0.1486 0.0611 0.3697 0.060 Uiso 1 1 calc R C 1
C48 C 0.12523(18) 0.0672(5) 0.2388(6) 0.0661(11) Uani 0.50 1 d P C 1
H48A H 0.1095 0.1033 0.2085 0.099 Uiso 0.50 1 calc PR C 1
H48B H 0.1205 0.0035 0.2316 0.099 Uiso 0.50 1 calc PR C 1
H48C H 0.1424 0.0797 0.2110 0.099 Uiso 0.50 1 calc PR C 1
C49 C 0.1348(3) 0.1942(9) 0.3542(7) 0.0661(11) Uani 0.50 1 d P C 1
H49A H 0.1489 0.2147 0.3162 0.099 Uiso 0.50 1 calc PR C 1
H49B H 0.1414 0.2080 0.4186 0.099 Uiso 0.50 1 calc PR C 1
H49C H 0.1168 0.2248 0.3350 0.099 Uiso 0.50 1 calc PR C 1
C48B C 0.13732(17) 0.0300(5) 0.2645(6) 0.0661(11) Uani 0.50 1 d P C 2
H48D H 0.1200 0.0194 0.2217 0.099 Uiso 0.50 1 calc PR C 2
H48E H 0.1448 -0.0272 0.2899 0.099 Uiso 0.50 1 calc PR C 2
H48F H 0.1515 0.0589 0.2319 0.099 Uiso 0.50 1 calc PR C 2
C49B C 0.1347(3) 0.1842(8) 0.3258(7) 0.0661(11) Uani 0.50 1 d P C 2
H49D H 0.1536 0.1935 0.3085 0.099 Uiso 0.50 1 calc PR C 2
H49E H 0.1329 0.2184 0.3814 0.099 Uiso 0.50 1 calc PR C 2
H49F H 0.1203 0.2045 0.2759 0.099 Uiso 0.50 1 calc PR C 2
Si1 Si 0.239710(14) 0.03914(4) 0.66078(4) 0.02887(16) Uani 1 1 d . . .
Si2 Si 0.101405(15) 0.04946(5) 0.40519(4) 0.03407(18) Uani 1 1 d . C .
Si3 Si 0.115254(15) 0.45434(4) 1.09282(4) 0.03261(17) Uani 1 1 d . . .
Si4 Si 0.003483(18) 0.26392(8) 0.53550(6) 0.0668(3) Uani 1 1 d . . .
 
loop_
 _atom_site_aniso_label
 _atom_site_aniso_U_11
 _atom_site_aniso_U_22
 _atom_site_aniso_U_33
 _atom_site_aniso_U_23
 _atom_site_aniso_U_13
 _atom_site_aniso_U_12
C1 0.0261(11) 0.0184(10) 0.0199(10) -0.0009(8) 0.0043(8) -0.0016(8)
C2 0.0226(10) 0.0211(10) 0.0214(10) 0.0020(9) 0.0037(8) -0.0010(8)
C3 0.0229(10) 0.0215(10) 0.0230(10) -0.0009(9) 0.0057(8) 0.0019(8)
C4 0.0269(11) 0.0248(11) 0.0236(11) -0.0012(10) 0.0031(8) 0.0009(9)
C5 0.0339(13) 0.0290(12) 0.0285(11) -0.0032(10) 0.0036(9) 0.0031(10)
C6 0.0426(15) 0.0582(18) 0.0383(14) -0.0067(14) -0.0020(12) 0.0046(13)
C7 0.059(2) 0.079(2) 0.068(2) 0.0207(19) 0.0056(16) 0.0201(18)
C8 0.062(2) 0.144(4) 0.0341(16) -0.027(2) -0.0136(14) 0.019(2)
C9 0.0537(16) 0.0290(13) 0.0393(14) -0.0072(11) 0.0131(12) -0.0046(12)
C10 0.077(2) 0.0564(19) 0.068(2) 0.0002(17) 0.0211(18) -0.0234(18)
C11 0.076(2) 0.0396(16) 0.0595(19) 0.0101(15) 0.0073(16) 0.0089(15)
C12 0.0438(15) 0.0370(14) 0.0341(13) -0.0083(11) 0.0095(11) -0.0094(11)
C13 0.0557(19) 0.068(2) 0.0513(17) -0.0245(16) 0.0236(14) -0.0151(16)
C14 0.076(2) 0.0454(18) 0.083(2) 0.0059(17) 0.0267(19) -0.0161(17)
C15 0.0280(11) 0.0221(11) 0.0228(10) -0.0017(9) 0.0054(9) 0.0001(9)
C16 0.0274(11) 0.0255(11) 0.0241(10) -0.0023(9) 0.0060(8) -0.0002(9)
C17 0.0241(11) 0.0229(10) 0.0217(10) 0.0013(9) 0.0022(8) -0.0003(9)
C18 0.0258(11) 0.0267(11) 0.0250(11) -0.0015(9) 0.0060(8) 0.0013(9)
C19 0.0298(11) 0.0244(11) 0.0198(10) -0.0004(9) 0.0034(8) -0.0021(9)
C20 0.0253(11) 0.0265(11) 0.0236(10) 0.0019(9) 0.0019(8) -0.0034(9)
C21 0.0250(11) 0.0280(11) 0.0236(10) 0.0005(9) 0.0050(8) 0.0017(9)
C22 0.0261(11) 0.0231(11) 0.0203(10) 0.0019(9) 0.0041(8) -0.0007(9)
C23 0.0306(13) 0.0405(14) 0.0293(12) -0.0052(11) 0.0017(10) -0.0004(11)
C24 0.0326(14) 0.068(2) 0.0473(16) -0.0092(15) -0.0020(12) 0.0002(14)
C25 0.0501(14) 0.090(6) 0.077(2) -0.009(2) -0.0071(13) 0.009(2)
C26 0.0501(14) 0.090(6) 0.077(2) -0.009(2) -0.0071(13) 0.009(2)
C27 0.0501(14) 0.090(6) 0.077(2) -0.009(2) -0.0071(13) 0.009(2)
C25B 0.0501(14) 0.090(6) 0.077(2) -0.009(2) -0.0071(13) 0.009(2)
C26B 0.0501(14) 0.090(6) 0.077(2) -0.009(2) -0.0071(13) 0.009(2)
C27B 0.0501(14) 0.090(6) 0.077(2) -0.009(2) -0.0071(13) 0.009(2)
C28 0.0306(12) 0.0266(11) 0.0265(11) 0.0005(10) 0.0017(9) 0.0038(9)
C29 0.0387(14) 0.0335(13) 0.0294(12) -0.0041(11) 0.0008(10) 0.0057(11)
C30 0.0508(17) 0.070(2) 0.0371(14) -0.0144(15) -0.0049(12) 0.0171(15)
C31 0.056(2) 0.130(4) 0.0537(19) -0.034(2) -0.0112(16) 0.041(2)
C32 0.0512(19) 0.125(3) 0.0368(15) -0.0300(19) -0.0032(13) 0.024(2)
C33 0.0488(16) 0.0351(14) 0.0493(16) -0.0091(13) 0.0204(13) 0.0011(12)
C34 0.074(2) 0.0439(17) 0.074(2) 0.0130(16) 0.0194(18) 0.0154(16)
C35 0.068(2) 0.066(2) 0.082(2) -0.0053(19) 0.0320(19) -0.0166(18)
C36 0.0456(16) 0.0419(15) 0.0396(14) -0.0053(12) 0.0059(12) -0.0011(12)
C37 0.065(2) 0.054(2) 0.101(3) 0.007(2) 0.017(2) -0.0108(17)
C38 0.0506(19) 0.076(2) 0.071(2) -0.0214(19) 0.0266(16) -0.0089(17)
C39 0.0312(12) 0.0291(12) 0.0265(11) -0.0027(10) 0.0006(9) 0.0002(10)
C40 0.0410(14) 0.0327(13) 0.0277(12) -0.0032(11) 0.0027(10) 0.0001(11)
C41 0.0538(18) 0.070(2) 0.0426(15) -0.0071(16) -0.0052(13) -0.0019(16)
C42 0.077(2) 0.081(5) 0.055(6) -0.004(3) -0.027(2) 0.000(3)
C43 0.077(2) 0.081(5) 0.055(6) -0.004(3) -0.027(2) 0.000(3)
C42B 0.077(2) 0.081(5) 0.055(6) -0.004(3) -0.027(2) 0.000(3)
C43B 0.077(2) 0.081(5) 0.055(6) -0.004(3) -0.027(2) 0.000(3)
C44 0.0600(18) 0.0347(14) 0.0407(14) -0.0103(12) 0.0101(13) -0.0050(13)
C45 0.083(3) 0.061(2) 0.085(3) 0.015(2) 0.026(2) -0.0142(19)
C46 0.075(2) 0.0465(17) 0.0543(18) -0.0039(15) 0.0054(16) 0.0121(16)
C47 0.0612(19) 0.0462(16) 0.0445(16) -0.0042(14) 0.0173(14) -0.0070(14)
C48 0.094(3) 0.056(3) 0.057(4) -0.011(2) 0.044(3) -0.0165(19)
C49 0.094(3) 0.056(3) 0.057(4) -0.011(2) 0.044(3) -0.0165(19)
C48B 0.094(3) 0.056(3) 0.057(4) -0.011(2) 0.044(3) -0.0165(19)
C49B 0.094(3) 0.056(3) 0.057(4) -0.011(2) 0.044(3) -0.0165(19)
Si1 0.0368(4) 0.0272(3) 0.0223(3) -0.0078(3) 0.0030(2) -0.0003(3)
Si2 0.0432(4) 0.0338(4) 0.0248(3) -0.0089(3) 0.0032(3) -0.0042(3)
Si3 0.0394(4) 0.0313(4) 0.0268(3) -0.0093(3) 0.0031(3) 0.0056(3)
Si4 0.0298(4) 0.1085(8) 0.0585(5) -0.0093(6) -0.0071(4) 0.0038(5)
 
_geom_special_details
;
 All esds (except the esd in the dihedral angle between two l.s. planes)
 are estimated using the full covariance matrix.  The cell esds are taken
 into account individually in the estimation of esds in distances, angles
 and torsion angles; correlations between esds in cell parameters are only
 used when they are defined by crystal symmetry.  An approximate (isotropic)
 treatment of cell esds is used for estimating esds involving l.s. planes.
;
 
loop_
 _geom_bond_atom_site_label_1
 _geom_bond_atom_site_label_2
 _geom_bond_distance
 _geom_bond_site_symmetry_2
 _geom_bond_publ_flag
C1 C3 1.397(3) . ?
C1 C2 1.420(3) . ?
C1 C4 1.430(3) . ?
C2 C3 1.389(3) 7_557 ?
C2 C15 1.432(3) . ?
C3 C2 1.389(3) 7_557 ?
C3 H3 0.9500 . ?
C4 C5 1.206(3) . ?
C5 Si1 1.848(2) . ?
C6 C7 1.502(4) . ?
C6 C8 1.547(4) . ?
C6 Si1 1.879(3) . ?
C6 H6 1.0000 . ?
C7 H7A 0.9800 . ?
C7 H7B 0.9800 . ?
C7 H7C 0.9800 . ?
C8 H8A 0.9800 . ?
C8 H8B 0.9800 . ?
C8 H8C 0.9800 . ?
C9 C10 1.527(4) . ?
C9 C11 1.528(4) . ?
C9 Si1 1.882(3) . ?
C9 H9 1.0000 . ?
C10 H10A 0.9800 . ?
C10 H10B 0.9800 . ?
C10 H10C 0.9800 . ?
C11 H11A 0.9800 . ?
C11 H11B 0.9800 . ?
C11 H11C 0.9800 . ?
C12 C14 1.521(4) . ?
C12 C13 1.530(4) . ?
C12 Si1 1.881(3) . ?
C12 H12 1.0000 . ?
C13 H13A 0.9800 . ?
C13 H13B 0.9800 . ?
C13 H13C 0.9800 . ?
C14 H14A 0.9800 . ?
C14 H14B 0.9800 . ?
C14 H14C 0.9800 . ?
C15 C16 1.202(3) . ?
C16 C17 1.431(3) . ?
C17 C18 1.396(3) . ?
C17 C22 1.415(3) . ?
C18 C19 1.395(3) . ?
C18 H18 0.9500 . ?
C19 C20 1.412(3) . ?
C19 C39 1.439(3) . ?
C20 C21 1.389(3) . ?
C20 C23 1.435(3) . ?
C21 C22 1.395(3) . ?
C21 H21 0.9500 . ?
C22 C28 1.440(3) . ?
C23 C24 1.199(3) . ?
C24 Si4 1.846(3) . ?
C25 Si4 1.750(16) . ?
C25 H25A 0.9800 . ?
C25 H25B 0.9800 . ?
C25 H25C 0.9800 . ?
C26 Si4 1.846(12) . ?
C26 H26A 0.9800 . ?
C26 H26B 0.9800 . ?
C26 H26C 0.9800 . ?
C27 Si4 1.929(13) . ?
C27 H27A 0.9800 . ?
C27 H27B 0.9800 . ?
C27 H27C 0.9800 . ?
C25B Si4 1.969(16) . ?
C25B H25D 0.9800 . ?
C25B H25E 0.9800 . ?
C25B H25F 0.9800 . ?
C26B Si4 1.875(12) . ?
C26B H26D 0.9800 . ?
C26B H26E 0.9800 . ?
C26B H26F 0.9800 . ?
C27B Si4 1.860(12) . ?
C27B H27D 0.9800 . ?
C27B H27E 0.9800 . ?
C27B H27F 0.9800 . ?
C28 C29 1.202(3) . ?
C29 Si3 1.849(2) . ?
C30 C31 1.481(4) . ?
C30 C32 1.515(4) . ?
C30 Si3 1.880(3) . ?
C30 H30 1.0000 . ?
C31 H31A 0.9800 . ?
C31 H31B 0.9800 . ?
C31 H31C 0.9800 . ?
C32 H32A 0.9800 . ?
C32 H32B 0.9800 . ?
C32 H32C 0.9800 . ?
C33 C34 1.520(4) . ?
C33 C35 1.530(4) . ?
C33 Si3 1.875(3) . ?
C33 H33 1.0000 . ?
C34 H34A 0.9800 . ?
C34 H34B 0.9800 . ?
C34 H34C 0.9800 . ?
C35 H35A 0.9800 . ?
C35 H35B 0.9800 . ?
C35 H35C 0.9800 . ?
C36 C37 1.519(4) . ?
C36 C38 1.529(4) . ?
C36 Si3 1.899(3) . ?
C36 H36 1.0000 . ?
C37 H37A 0.9800 . ?
C37 H37B 0.9800 . ?
C37 H37C 0.9800 . ?
C38 H38A 0.9800 . ?
C38 H38B 0.9800 . ?
C38 H38C 0.9800 . ?
C39 C40 1.199(3) . ?
C40 Si2 1.848(2) . ?
C41 C43 1.47(2) . ?
C41 C42B 1.537(17) . ?
C41 C42 1.576(17) . ?
C41 C43B 1.58(2) . ?
C41 Si2 1.883(3) . ?
C41 H41 1.0000 . ?
C42 H42A 0.9800 . ?
C42 H42B 0.9800 . ?
C42 H42C 0.9800 . ?
C43 H43A 0.9800 . ?
C43 H43B 0.9800 . ?
C43 H43C 0.9800 . ?
C42B H42D 0.9800 . ?
C42B H42E 0.9800 . ?
C42B H42F 0.9800 . ?
C43B H43D 0.9800 . ?
C43B H43E 0.9800 . ?
C43B H43F 0.9800 . ?
C44 C46 1.526(4) . ?
C44 C45 1.528(4) . ?
C44 Si2 1.876(3) . ?
C44 H44 1.0000 . ?
C45 H45A 0.9800 . ?
C45 H45B 0.9800 . ?
C45 H45C 0.9800 . ?
C46 H46A 0.9800 . ?
C46 H46B 0.9800 . ?
C46 H46C 0.9800 . ?
C47 C49B 1.429(13) . ?
C47 C48B 1.535(8) . ?
C47 C48 1.556(9) . ?
C47 C49 1.560(12) . ?
C47 Si2 1.879(3) . ?
C47 H47 1.0000 . ?
C48 H48A 0.9800 . ?
C48 H48B 0.9800 . ?
C48 H48C 0.9800 . ?
C49 H49A 0.9800 . ?
C49 H49B 0.9800 . ?
C49 H49C 0.9800 . ?
C48B H48D 0.9800 . ?
C48B H48E 0.9800 . ?
C48B H48F 0.9800 . ?
C49B H49D 0.9800 . ?
C49B H49E 0.9800 . ?
C49B H49F 0.9800 . ?
 
loop_
 _geom_angle_atom_site_label_1
 _geom_angle_atom_site_label_2
 _geom_angle_atom_site_label_3
 _geom_angle
 _geom_angle_site_symmetry_1
 _geom_angle_site_symmetry_3
 _geom_angle_publ_flag
C3 C1 C2 118.89(18) . . ?
C3 C1 C4 118.79(19) . . ?
C2 C1 C4 122.32(19) . . ?
C3 C2 C1 118.89(18) 7_557 . ?
C3 C2 C15 119.88(19) 7_557 . ?
C1 C2 C15 121.20(19) . . ?
C2 C3 C1 122.22(19) 7_557 . ?
C2 C3 H3 118.9 7_557 . ?
C1 C3 H3 118.9 . . ?
C5 C4 C1 176.2(2) . . ?
C4 C5 Si1 172.6(2) . . ?
C7 C6 C8 112.6(3) . . ?
C7 C6 Si1 114.9(2) . . ?
C8 C6 Si1 110.5(2) . . ?
C7 C6 H6 106.0 . . ?
C8 C6 H6 106.0 . . ?
Si1 C6 H6 106.0 . . ?
C6 C7 H7A 109.5 . . ?
C6 C7 H7B 109.5 . . ?
H7A C7 H7B 109.5 . . ?
C6 C7 H7C 109.5 . . ?
H7A C7 H7C 109.5 . . ?
H7B C7 H7C 109.5 . . ?
C6 C8 H8A 109.5 . . ?
C6 C8 H8B 109.5 . . ?
H8A C8 H8B 109.5 . . ?
C6 C8 H8C 109.5 . . ?
H8A C8 H8C 109.5 . . ?
H8B C8 H8C 109.5 . . ?
C10 C9 C11 110.8(3) . . ?
C10 C9 Si1 113.5(2) . . ?
C11 C9 Si1 111.62(19) . . ?
C10 C9 H9 106.8 . . ?
C11 C9 H9 106.8 . . ?
Si1 C9 H9 106.8 . . ?
C9 C10 H10A 109.5 . . ?
C9 C10 H10B 109.5 . . ?
H10A C10 H10B 109.5 . . ?
C9 C10 H10C 109.5 . . ?
H10A C10 H10C 109.5 . . ?
H10B C10 H10C 109.5 . . ?
C9 C11 H11A 109.5 . . ?
C9 C11 H11B 109.5 . . ?
H11A C11 H11B 109.5 . . ?
C9 C11 H11C 109.5 . . ?
H11A C11 H11C 109.5 . . ?
H11B C11 H11C 109.5 . . ?
C14 C12 C13 111.5(2) . . ?
C14 C12 Si1 114.5(2) . . ?
C13 C12 Si1 114.77(18) . . ?
C14 C12 H12 105.0 . . ?
C13 C12 H12 105.0 . . ?
Si1 C12 H12 105.0 . . ?
C12 C13 H13A 109.5 . . ?
C12 C13 H13B 109.5 . . ?
H13A C13 H13B 109.5 . . ?
C12 C13 H13C 109.5 . . ?
H13A C13 H13C 109.5 . . ?
H13B C13 H13C 109.5 . . ?
C12 C14 H14A 109.5 . . ?
C12 C14 H14B 109.5 . . ?
H14A C14 H14B 109.5 . . ?
C12 C14 H14C 109.5 . . ?
H14A C14 H14C 109.5 . . ?
H14B C14 H14C 109.5 . . ?
C16 C15 C2 177.7(2) . . ?
C15 C16 C17 176.0(2) . . ?
C18 C17 C22 118.83(19) . . ?
C18 C17 C16 118.98(19) . . ?
C22 C17 C16 122.16(19) . . ?
C19 C18 C17 121.88(19) . . ?
C19 C18 H18 119.1 . . ?
C17 C18 H18 119.1 . . ?
C18 C19 C20 119.09(19) . . ?
C18 C19 C39 120.4(2) . . ?
C20 C19 C39 120.46(19) . . ?
C21 C20 C19 119.11(19) . . ?
C21 C20 C23 119.2(2) . . ?
C19 C20 C23 121.6(2) . . ?
C20 C21 C22 122.0(2) . . ?
C20 C21 H21 119.0 . . ?
C22 C21 H21 119.0 . . ?
C21 C22 C17 119.08(19) . . ?
C21 C22 C28 117.36(19) . . ?
C17 C22 C28 123.55(19) . . ?
C24 C23 C20 175.9(3) . . ?
C23 C24 Si4 174.7(3) . . ?
Si4 C25 H25A 109.5 . . ?
Si4 C25 H25B 109.5 . . ?
Si4 C25 H25C 109.5 . . ?
Si4 C26 H26A 109.5 . . ?
Si4 C26 H26B 109.5 . . ?
Si4 C26 H26C 109.5 . . ?
Si4 C27 H27A 109.5 . . ?
Si4 C27 H27B 109.5 . . ?
Si4 C27 H27C 109.5 . . ?
Si4 C25B H25D 109.5 . . ?
Si4 C25B H25E 109.5 . . ?
H25D C25B H25E 109.5 . . ?
Si4 C25B H25F 109.5 . . ?
H25D C25B H25F 109.5 . . ?
H25E C25B H25F 109.5 . . ?
Si4 C26B H26D 109.5 . . ?
Si4 C26B H26E 109.5 . . ?
H26D C26B H26E 109.5 . . ?
Si4 C26B H26F 109.5 . . ?
H26D C26B H26F 109.5 . . ?
H26E C26B H26F 109.5 . . ?
Si4 C27B H27D 109.5 . . ?
Si4 C27B H27E 109.5 . . ?
H27D C27B H27E 109.5 . . ?
Si4 C27B H27F 109.5 . . ?
H27D C27B H27F 109.5 . . ?
H27E C27B H27F 109.5 . . ?
C29 C28 C22 172.7(2) . . ?
C28 C29 Si3 176.5(2) . . ?
C31 C30 C32 113.9(3) . . ?
C31 C30 Si3 115.4(2) . . ?
C32 C30 Si3 113.3(2) . . ?
C31 C30 H30 104.2 . . ?
C32 C30 H30 104.2 . . ?
Si3 C30 H30 104.2 . . ?
C30 C31 H31A 109.5 . . ?
C30 C31 H31B 109.5 . . ?
H31A C31 H31B 109.5 . . ?
C30 C31 H31C 109.5 . . ?
H31A C31 H31C 109.5 . . ?
H31B C31 H31C 109.5 . . ?
C30 C32 H32A 109.5 . . ?
C30 C32 H32B 109.5 . . ?
H32A C32 H32B 109.5 . . ?
C30 C32 H32C 109.5 . . ?
H32A C32 H32C 109.5 . . ?
H32B C32 H32C 109.5 . . ?
C34 C33 C35 110.3(3) . . ?
C34 C33 Si3 111.6(2) . . ?
C35 C33 Si3 113.7(2) . . ?
C34 C33 H33 107.0 . . ?
C35 C33 H33 107.0 . . ?
Si3 C33 H33 107.0 . . ?
C33 C34 H34A 109.5 . . ?
C33 C34 H34B 109.5 . . ?
H34A C34 H34B 109.5 . . ?
C33 C34 H34C 109.5 . . ?
H34A C34 H34C 109.5 . . ?
H34B C34 H34C 109.5 . . ?
C33 C35 H35A 109.5 . . ?
C33 C35 H35B 109.5 . . ?
H35A C35 H35B 109.5 . . ?
C33 C35 H35C 109.5 . . ?
H35A C35 H35C 109.5 . . ?
H35B C35 H35C 109.5 . . ?
C37 C36 C38 110.2(3) . . ?
C37 C36 Si3 112.2(2) . . ?
C38 C36 Si3 113.9(2) . . ?
C37 C36 H36 106.7 . . ?
C38 C36 H36 106.7 . . ?
Si3 C36 H36 106.7 . . ?
C36 C37 H37A 109.5 . . ?
C36 C37 H37B 109.5 . . ?
H37A C37 H37B 109.5 . . ?
C36 C37 H37C 109.5 . . ?
H37A C37 H37C 109.5 . . ?
H37B C37 H37C 109.5 . . ?
C36 C38 H38A 109.5 . . ?
C36 C38 H38B 109.5 . . ?
H38A C38 H38B 109.5 . . ?
C36 C38 H38C 109.5 . . ?
H38A C38 H38C 109.5 . . ?
H38B C38 H38C 109.5 . . ?
C40 C39 C19 179.0(3) . . ?
C39 C40 Si2 178.7(2) . . ?
C43 C41 C42B 94.3(5) . . ?
C43 C41 C42 112.8(4) . . ?
C42B C41 C43B 109.6(6) . . ?
C42 C41 C43B 127.9(6) . . ?
C43 C41 Si2 118.5(5) . . ?
C42B C41 Si2 115.6(4) . . ?
C42 C41 Si2 111.4(4) . . ?
C43B C41 Si2 109.2(4) . . ?
C43 C41 H41 104.1 . . ?
C42B C41 H41 120.3 . . ?
C42 C41 H41 104.1 . . ?
C43B C41 H41 96.1 . . ?
Si2 C41 H41 104.1 . . ?
C41 C42 H42A 109.5 . . ?
C41 C42 H42B 109.5 . . ?
C41 C42 H42C 109.5 . . ?
C41 C43 H43A 109.5 . . ?
C41 C43 H43B 109.5 . . ?
C41 C43 H43C 109.5 . . ?
C41 C42B H42D 109.5 . . ?
C41 C42B H42E 109.5 . . ?
H42D C42B H42E 109.5 . . ?
C41 C42B H42F 109.5 . . ?
H42D C42B H42F 109.5 . . ?
H42E C42B H42F 109.5 . . ?
C41 C43B H43D 109.5 . . ?
C41 C43B H43E 109.5 . . ?
H43D C43B H43E 109.5 . . ?
C41 C43B H43F 109.5 . . ?
H43D C43B H43F 109.5 . . ?
H43E C43B H43F 109.5 . . ?
C46 C44 C45 109.8(3) . . ?
C46 C44 Si2 112.4(2) . . ?
C45 C44 Si2 112.2(2) . . ?
C46 C44 H44 107.4 . . ?
C45 C44 H44 107.4 . . ?
Si2 C44 H44 107.4 . . ?
C44 C45 H45A 109.5 . . ?
C44 C45 H45B 109.5 . . ?
H45A C45 H45B 109.5 . . ?
C44 C45 H45C 109.5 . . ?
H45A C45 H45C 109.5 . . ?
H45B C45 H45C 109.5 . . ?
C44 C46 H46A 109.5 . . ?
C44 C46 H46B 109.5 . . ?
H46A C46 H46B 109.5 . . ?
C44 C46 H46C 109.5 . . ?
H46A C46 H46C 109.5 . . ?
H46B C46 H46C 109.5 . . ?
C49B C47 C48B 113.7(4) . . ?
C49B C47 C48 93.5(5) . . ?
C48B C47 C49 129.2(4) . . ?
C48 C47 C49 109.6(5) . . ?
C49B C47 Si2 122.2(5) . . ?
C48B C47 Si2 114.6(3) . . ?
C48 C47 Si2 112.0(3) . . ?
C49 C47 Si2 111.4(4) . . ?
C49B C47 H47 112.0 . . ?
C48B C47 H47 77.3 . . ?
C48 C47 H47 107.9 . . ?
C49 C47 H47 107.9 . . ?
Si2 C47 H47 107.9 . . ?
C47 C48 H48A 109.5 . . ?
C47 C48 H48B 109.5 . . ?
C47 C48 H48C 109.5 . . ?
C47 C49 H49A 109.5 . . ?
C47 C49 H49B 109.5 . . ?
C47 C49 H49C 109.5 . . ?
C47 C48B H48D 109.5 . . ?
C47 C48B H48E 109.5 . . ?
H48D C48B H48E 109.5 . . ?
C47 C48B H48F 109.5 . . ?
H48D C48B H48F 109.5 . . ?
H48E C48B H48F 109.5 . . ?
C47 C49B H49D 109.5 . . ?
C47 C49B H49E 109.5 . . ?
H49D C49B H49E 109.5 . . ?
C47 C49B H49F 109.5 . . ?
H49D C49B H49F 109.5 . . ?
H49E C49B H49F 109.5 . . ?
C5 Si1 C6 107.82(11) . . ?
C5 Si1 C12 104.70(11) . . ?
C6 Si1 C12 116.07(13) . . ?
C5 Si1 C9 108.81(11) . . ?
C6 Si1 C9 110.17(13) . . ?
C12 Si1 C9 108.94(12) . . ?
C40 Si2 C44 106.93(12) . . ?
C40 Si2 C47 106.07(12) . . ?
C44 Si2 C47 109.47(13) . . ?
C40 Si2 C41 107.25(13) . . ?
C44 Si2 C41 109.79(14) . . ?
C47 Si2 C41 116.81(15) . . ?
C29 Si3 C33 108.58(12) . . ?
C29 Si3 C30 107.16(12) . . ?
C33 Si3 C30 114.67(14) . . ?
C29 Si3 C36 105.79(12) . . ?
C33 Si3 C36 109.39(12) . . ?
C30 Si3 C36 110.82(14) . . ?
C25 Si4 C24 113.8(3) . . ?
C25 Si4 C26 104.1(6) . . ?
C24 Si4 C26 107.3(3) . . ?
C25 Si4 C27B 97.9(5) . . ?
C24 Si4 C27B 108.5(3) . . ?
C26 Si4 C27B 125.1(5) . . ?
C25 Si4 C26B 117.0(6) . . ?
C24 Si4 C26B 109.4(3) . . ?
C27B Si4 C26B 109.5(4) . . ?
C25 Si4 C27 113.3(5) . . ?
C24 Si4 C27 106.1(3) . . ?
C26 Si4 C27 112.2(4) . . ?
C26B Si4 C27 95.4(4) . . ?
C24 Si4 C25B 103.6(3) . . ?
C26 Si4 C25B 103.8(5) . . ?
C27B Si4 C25B 106.6(5) . . ?
C26B Si4 C25B 118.9(5) . . ?
C27 Si4 C25B 122.7(5) . . ?
 
loop_
 _geom_torsion_atom_site_label_1
 _geom_torsion_atom_site_label_2
 _geom_torsion_atom_site_label_3
 _geom_torsion_atom_site_label_4
 _geom_torsion
 _geom_torsion_site_symmetry_1
 _geom_torsion_site_symmetry_2
 _geom_torsion_site_symmetry_3
 _geom_torsion_site_symmetry_4
 _geom_torsion_publ_flag
C3 C1 C2 C3 -0.3(3) . . . 7_557 ?
C4 C1 C2 C3 179.26(19) . . . 7_557 ?
C3 C1 C2 C15 177.55(19) . . . . ?
C4 C1 C2 C15 -2.9(3) . . . . ?
C2 C1 C3 C2 0.3(3) . . . 7_557 ?
C4 C1 C3 C2 -179.27(19) . . . 7_557 ?
C22 C17 C18 C19 0.4(3) . . . . ?
C16 C17 C18 C19 178.6(2) . . . . ?
C17 C18 C19 C20 -0.4(3) . . . . ?
C17 C18 C19 C39 178.8(2) . . . . ?
C18 C19 C20 C21 0.1(3) . . . . ?
C39 C19 C20 C21 -179.1(2) . . . . ?
C18 C19 C20 C23 178.1(2) . . . . ?
C39 C19 C20 C23 -1.0(3) . . . . ?
C19 C20 C21 C22 0.3(3) . . . . ?
C23 C20 C21 C22 -177.8(2) . . . . ?
C20 C21 C22 C17 -0.3(3) . . . . ?
C20 C21 C22 C28 179.8(2) . . . . ?
C18 C17 C22 C21 0.0(3) . . . . ?
C16 C17 C22 C21 -178.2(2) . . . . ?
C18 C17 C22 C28 179.9(2) . . . . ?
C16 C17 C22 C28 1.7(3) . . . . ?
C7 C6 Si1 C5 42.4(3) . . . . ?
C8 C6 Si1 C5 171.1(2) . . . . ?
C7 C6 Si1 C12 -74.6(3) . . . . ?
C8 C6 Si1 C12 54.1(3) . . . . ?
C7 C6 Si1 C9 161.0(2) . . . . ?
C8 C6 Si1 C9 -70.3(3) . . . . ?
C14 C12 Si1 C5 -66.4(2) . . . . ?
C13 C12 Si1 C5 162.8(2) . . . . ?
C14 C12 Si1 C6 52.3(2) . . . . ?
C13 C12 Si1 C6 -78.5(2) . . . . ?
C14 C12 Si1 C9 177.3(2) . . . . ?
C13 C12 Si1 C9 46.5(2) . . . . ?
C10 C9 Si1 C5 69.7(2) . . . . ?
C11 C9 Si1 C5 -56.3(2) . . . . ?
C10 C9 Si1 C6 -48.3(2) . . . . ?
C11 C9 Si1 C6 -174.3(2) . . . . ?
C10 C9 Si1 C12 -176.7(2) . . . . ?
C11 C9 Si1 C12 57.3(2) . . . . ?
C46 C44 Si2 C40 -57.8(2) . . . . ?
C45 C44 Si2 C40 66.6(2) . . . . ?
C46 C44 Si2 C47 56.7(2) . . . . ?
C45 C44 Si2 C47 -178.9(2) . . . . ?
C46 C44 Si2 C41 -173.8(2) . . . . ?
C45 C44 Si2 C41 -49.4(3) . . . . ?
C49B C47 Si2 C40 -54.8(7) . . . . ?
C48B C47 Si2 C40 161.1(4) . . . . ?
C48 C47 Si2 C40 -164.2(4) . . . . ?
C49 C47 Si2 C40 -41.0(6) . . . . ?
C49B C47 Si2 C44 -169.8(7) . . . . ?
C48B C47 Si2 C44 46.1(4) . . . . ?
C48 C47 Si2 C44 80.8(4) . . . . ?
C49 C47 Si2 C44 -156.0(6) . . . . ?
C49B C47 Si2 C41 64.7(7) . . . . ?
C48B C47 Si2 C41 -79.4(4) . . . . ?
C48 C47 Si2 C41 -44.7(4) . . . . ?
C49 C47 Si2 C41 78.4(6) . . . . ?
C43 C41 Si2 C40 67.1(7) . . . . ?
C42B C41 Si2 C40 177.9(4) . . . . ?
C42 C41 Si2 C40 -159.6(4) . . . . ?
C43B C41 Si2 C40 53.8(7) . . . . ?
C43 C41 Si2 C44 -177.1(6) . . . . ?
C42B C41 Si2 C44 -66.3(4) . . . . ?
C42 C41 Si2 C44 -43.8(4) . . . . ?
C43B C41 Si2 C44 169.6(7) . . . . ?
C43 C41 Si2 C47 -51.7(7) . . . . ?
C42B C41 Si2 C47 59.1(4) . . . . ?
C42 C41 Si2 C47 81.6(4) . . . . ?
C43B C41 Si2 C47 -65.1(7) . . . . ?
C34 C33 Si3 C29 59.9(2) . . . . ?
C35 C33 Si3 C29 -65.7(2) . . . . ?
C34 C33 Si3 C30 179.67(19) . . . . ?
C35 C33 Si3 C30 54.1(3) . . . . ?
C34 C33 Si3 C36 -55.1(2) . . . . ?
C35 C33 Si3 C36 179.3(2) . . . . ?
C31 C30 Si3 C29 31.0(3) . . . . ?
C32 C30 Si3 C29 164.8(2) . . . . ?
C31 C30 Si3 C33 -89.6(3) . . . . ?
C32 C30 Si3 C33 44.2(3) . . . . ?
C31 C30 Si3 C36 146.0(3) . . . . ?
C32 C30 Si3 C36 -80.3(3) . . . . ?
C37 C36 Si3 C29 68.3(2) . . . . ?
C38 C36 Si3 C29 -165.7(2) . . . . ?
C37 C36 Si3 C33 -174.9(2) . . . . ?
C38 C36 Si3 C33 -48.9(2) . . . . ?
C37 C36 Si3 C30 -47.5(3) . . . . ?
C38 C36 Si3 C30 78.5(2) . . . . ?
 
_diffrn_measured_fraction_theta_max    0.994
_diffrn_reflns_theta_full              28.69
_diffrn_measured_fraction_theta_full   0.994
_refine_diff_density_max    0.960
_refine_diff_density_min   -0.639
_refine_diff_density_rms    0.056
